# Supplementary material for: Evaluation of a stand-alone mobile mindfulness app in people experiencing infertility: the protocol for an exploratory randomised controlled trial (MoMiFer-RCT)
Source: HighWire-hosted journal article supplement (doi:10.1136/bmjopen-2021-050088), 2022-02-01
Supplement: bmjopen-2021-050088supp001_data_supplement.pdf [file bmjopen-2021-050088supp001_data_supplement.pdf]

**Evaluatie van een Mobiel Mindfulness Programma (mMP) bij  
individuen/koppels met Fertiliteitsproblemen: MoMiFer studie**

**Opdrachtgever:** KU Leuven

**Onderzoeksinstelling:** Leuven Mindfulness Centre (LMC), KU Leuven, Faculteit Psychologische en Pedagogische Wetenschappen, Tiensestraat 102, 3000 Leuven

**Comité voor Medische Ethiek:**

Centraal Ethisch Comité: Ethische Commissie Onderzoek UZ/KU Leuven

**Plaatselijke onderzoekers:** Prof. Dr. Filip Raes (LMC), Dr. Katleen Van der Gucht (LMC), Tessy Boedt (KU Leuven), Dr. Sharon Lie Fong (LUFC), Prof. Dr. Peter Kuppens (LMC), Prof. Dr. Ir. Christophe Matthys (KU Leuven), Nele Willaert (studente KU Leuven)

**Contactpersoon:** Nele Willaert, Tessy Boedt of Katleen Van der Gucht

Herestraat 49 - ON1 – box 902, 3000 Leuven  
[nele.willaert@student.kuleuven.be](mailto:nele.willaert@student.kuleuven.be) +32479566999  
[tessy.boedt@kuleuven.be](mailto:tessy.boedt@kuleuven.be) +3216329946  
[katleen.vandergucht@kuleuven.be](mailto:katleen.vandergucht@kuleuven.be) +3216373183

Geachte mevrouw, mijnheer,

U wordt uitgenodigd om deel te nemen aan een studie ter evaluatie van een mobiel mindfulness programma voor individuen/koppels met fertiliteitsproblemen.

Voordat u akkoord gaat om deel te nemen aan deze studie willen we u wat meer informatie geven over wat dit betekent op organisatorisch vlak en wat de eventuele voordelen en risico's voor u zijn. Zo kan u een beslissing nemen op basis van de juiste informatie. Dit wordt 'geïnformeerde toestemming' genoemd.

Wij vragen u de volgende pagina's met informatie aandachtig te lezen. Heeft u vragen, dan kan u terecht bij de onderzoeker of haar/zijn vertegenwoordiger.

**I Noodzakelijke informatie voor uw beslissing om deel te nemen**

**Als u aan deze klinische studie deelneemt, moet u weten dat:**

- deze studie is opgesteld na evaluatie door een ethisch comité.
- uw deelname vrijwillig is; er kan op geen enkele manier sprake zijn van dwang. Voor deelname is uw ondertekende toestemming nodig. Ook nadat u hebt getekend, kan u de onderzoeker laten weten dat u uw deelname wilt stopzetten.
- de gegevens die in het kader van uw deelname worden verzameld, vertrouwelijk zijn. Bij de publicatie van de resultaten is uw anonimiteit verzekerd.
- er u geen kosten worden aangerekend in het kader van deze studie.
- er een verzekering is afgesloten voor het geval dat u schade zou oplopen in het kader van uw deelname aan deze studie.
- U geen vergoeding/compensatie zal ontvangen voor deze studie
- indien u extra informatie wenst, u altijd contact kan opnemen met de onderzoeker of de medewerker van haar team.

### **Doelstelling en beschrijving van deze studie**

Deze studie onderzoekt of het volgen van een mindfulness programma aangeboden via een mobiele applicatie (mMP) een meerwaarde kan bieden voor individuen/koppels met fertiliteitsproblemen. Er zijn aanwijzingen dat mindfulness zou kunnen bijdragen aan beter mentaal welzijn bij individuen/koppels met fertiliteitsproblemen. Een mobiel mindfulnessprogramma is laagdrempelig en minder tijdsintensief dan een klassiek mindfulnessprogramma. Omdat het effect van een mobiel mindfulnessprogramma voor individuen/koppels met fertiliteitsproblemen nog niet grondig onderzocht is, weten we nog niet zeker of dergelijke ondersteuning werkt. Daarom werd deze studie opgezet.

### **Wat is mindfulness?:**

De basis van mindfulness is het trainen van aandacht: we leren onze aandacht heel bewust op het hier en nu te richten in plaats van ons continu te verliezen in negatieve gedachten. De voorbije tien jaar heeft wetenschappelijk onderzoek overtuigend aangetoond dat mindfulness kan helpen bij de aanpak en het voorkomen van stress, langdurige pijn, angst en depressie.

### **Voorwaarde voor deelname**

U komt in aanmerking om deel te nemen aan onze studie indien u aan volgende voorwaarden voldoet:

- U en/of uw partner ervaren fertiliteitsproblemen
- U en/of uw partner zijn beide in het bezit van een smartphone
- U en/of uw partner begrijpen voldoende de Nederlandse taal

### **Verloop van de studie**

Indien u beslist om deel te nemen aan de studie en aan alle voorwaarden voor deelname voldoet, zal u via loting aan een bepaalde groep toegewezen worden:

Groep 1: krijgt onmiddellijk toegang tot een mindfulnessprogramma aangeboden via een mobiele applicatie; Groep 2: is een wachtlijst-controle groep. Dit betekent dat u eerst op een wachtlijst komt. U krijgt toegang tot een mindfulnessprogramma via een mobiele applicatie na 3 maanden.

We vragen u deze mobiele applicatie te gebruiken. U kan zelf kiezen welke oefeningen u precies uitvoert of volgt.

Om een goede vergelijking van de resultaten in beide onderzoeksgroepen mogelijk te maken, vragen wij aan iedereen om 1 week voor de studie en na 1.5 en 3 maanden online vragenlijsten in te vullen. Dit geldt voor alle deelnemers ongeacht de groep. Deze vragenlijsten peilen naar uw levenskwaliteit, hoe u zich voelt (stemming, stress, angst, depressieve gevoelens), hoe u denkt (bijvoorbeeld over uzelf) en hoe het met uw aandacht gesteld is. Het invullen van de vragenlijsten duurt ongeveer 45 minuten. Naast het invullen van de vragenlijsten zal u ook gevraagd worden om gedurende 4 dagen een soort van dagboek bij te houden op uw smartphone. Tijdens deze 4 dagen wordt u gedurende de dag 10 maal opgepiept, waarbij zal gevraagd worden een aantal korte vragen te beantwoorden over uw stemming en gedachten. Het beantwoorden van deze vragen duurt ongeveer 90 seconden.

Voor de analyse van onze onderzoeksbevindingen zullen we ook registreren hoe vaak en hoe lang u de mindfulness app gebruikt.

### **Risico's, nadelen en voordelen**

Er zijn geen extra risico's door het deelnemen aan deze studie in vergelijking met individuen/koppels die niet deelnemen aan deze studie.

Een nadeel aan deelnemen aan deze studie zou kunnen zijn dat wij u vragen om, onafhankelijk van de groep waarvoor u loot, verscheidene online vragenlijsten in te vullen op verschillende momenten in de tijd, wat tijd vergt.

Een voordeel van deelname aan deze studie, is dat de informatie die dankzij deze studie verkregen wordt, kan bijdragen tot een betere kennis van de impact van een mobiel mindfulness programma bij fertiliteitsproblemen.

### **Stopzetting van de deelname/intrekking van toestemming**

Uw deelname is geheel vrijwillig. U hebt het recht om uw deelname aan de studie om eender welke reden en zonder opgave van redenen stop te zetten. U kan om eender welke reden en zonder opgave van redenen uw toestemming tot deelname aan de studie intrekken. Hiermee trekt u de toestemming inzake de verwerking van uw gegevens in. Wel kan het voor de onderzoeker nuttig zijn om te weten of u zich terugtrekt omdat de aan de studie verbonden beperkingen te zwaar zijn (bijvoorbeeld te veel follow-up vragenlijsten).

### **Indien u aan deze studie deelneemt, vragen wij u het volgende:**

- Ten volle mee te werken voor een correct verloop van de studie.
- Geen informatie over uw emotionele of gezondheidstoestand of de symptomen die u ervaart, te verzwijgen.

### **Contact**

Als u bijkomende informatie wenst, maar ook ingeval van problemen of als u zich zorgen maakt, kan u contact opnemen met de onderzoekers (Nele Willaert, Tessy Boedt en Katleen Van der Gucht) op de telefoonnummers respectievelijk (+32479566999 +3216329946 of +3216373183) of via [nele.willaert@student.kuleuven.be](mailto:nele.willaert@student.kuleuven.be) [tessy.boedt@kuleuven.be](mailto:tessy.boedt@kuleuven.be) of [katleen.vandergucht@kuleuven.be](mailto:katleen.vandergucht@kuleuven.be)

Als u vragen hebt met betrekking tot uw rechten als deelnemer aan de studie, kan u contact opnemen met de ombudsdienst op het telefoonnummer: +3216344818 of via [ombudsdienst@uzleuven.be](mailto:ombudsdienst@uzleuven.be). Indien nodig kan de ombudsdienst u in contact brengen met het Ethisch Comité.

### **Extra nuttige contactgegevens**

Als u wel eens vaker last hebt van sombere of angstige gevoelens of wanneer u merkt dat u vaker piekert dan u eigenlijk zou willen, dan wilt u daar misschien over praten met iemand. Weet dat u daarvoor steeds terecht kan bij onder andere deze diensten en centra:

- Indien u behoefte heeft aan een gesprek, zonder dat u wil zeggen wie u bent (dus 'anoniem'), kan u daarvoor steeds terecht bij de telefonische dienst Tele-Onthaal bel 106 (voor iedereen 24/24u en 7/7 dagen toegankelijk).
- U kan ook terecht op [www.tele-onthaal.be](http://www.tele-onthaal.be) voor chatsessies en meer info.
- U kan een Centrum voor Geestelijke Gezondheidszorg contacteren bij u in de buurt (<http://www.geestelijkgezondvlaanderen.be/centrum-geestelijke-gezondheidszorg-cgg>).
- Uiteraard kan u zich ook altijd wenden tot uw eigen huisarts of de huisarts van wacht in uw buurt (zie: [www.mediwacht.be](http://www.mediwacht.be)).

Titel van de studie: **Evaluatie van een Mobiel Mindfulness Programma (mMP) bij individuen/koppels met Fertiliteitsproblemen: MoMiFer studie.**

## II Geïnformeerde toestemming

### Deelnemer

Vooraleer u start met deze studie, dient u uw geïnformeerde toestemming te geven voor de deelname aan deze studie. Daarvoor is het noodzakelijk dat u onderstaande informatie grondig doorneemt.

Ik verklaar dat ik geïnformeerd ben over de aard, het doel, de duur, de eventuele voordelen en risico's van de studie en dat ik weet wat van mij wordt verwacht. Dit houdt het volgende in:

- Het volgen een mindfulness programma (onmiddellijk of na een wachtlijst) via een mobiele applicatie gedurende 3 maanden. Het gebruik van deze applicatie wordt geregistreerd door de onderzoekers.
- Op 3 momenten (bij start van de studie, na 1,5 maanden en na 3 maanden) online vragenlijsten invullen betreffende mijn mentaal welzijn.
- Op diezelfde meetmomenten gedurende 4 dagen, 10 keer per dag enkele vragen beantwoorden via mijn smartphone betreffende mijn mentaal welzijn.

Ik heb alle vragen kunnen stellen die bij me opkwamen en ik heb een duidelijk antwoord gekregen op mijn vragen.

Ik begrijp dat aan mijn deelname geen enkel risico verbonden is.

Ik begrijp dat mijn deelname aan deze studie geheel vrijwillig is en dat er dus geen enkele sprake van dwang is. Ik heb het recht op elk moment mijn deelname stop te zetten. Bij het stopzetten van mijn deelname hoef ik geen reden te geven en brengt dit in geen enkel geval nadelen of enig ander gevolg met zich mee.

Ik begrijp dat alle informatie vertrouwelijk is en mijn anonimiteit wordt gegarandeerd. Dit wil zeggen dat mijn naam niet terug gelinkt kan worden met mijn ingevulde online vragenlijst en dat er nergens gevraagd wordt mijn naam of andere namen te vermelden. De resultaten van dit onderzoek kunnen gebruikt worden voor wetenschappelijke doeleinden en mogen gepubliceerd worden. Mijn naam wordt daarbij niet gepubliceerd, anonimiteit en de vertrouwelijkheid van de gegevens is in elk stadium van het onderzoek gewaarborgd.

Ik heb een exemplaar ontvangen van de informatie aan de deelnemer en de geïnformeerde toestemming. Indien ik nog vragen heb omtrent de studie of extra informatie wil, kan ik terecht bij: Nele Willaert: [nele.willaert@student.kuleuven.be](mailto:nele.willaert@student.kuleuven.be) (gsmnummer: 0479566999) of Tessy Boedt: [tessy.boedt@kuleuven.be](mailto:tessy.boedt@kuleuven.be) (telefoonnummer: +3216329946)

**Ik ga ermee akkoord / Ik ga er niet mee akkoord (doorhalen wat niet van toepassing is)** dat mijn gegevens die voor de hier vermelde studie worden verzameld, later zullen worden verwerkt, op voorwaarde dat deze verwerking beperkt blijft tot de context van de hier vermelde studie voor een betere kennis van de impact van mindfulness bij fertiliteitsproblemen.

Naam, voornaam, datum en handtekening van de deelnemers:

**Onderzoeker**

Ik ondergetekende, ..... verklaar de benodigde informatie inzake deze studie mondeling te hebben verstrekt evenals een exemplaar van het informatiedocument aan de deelnemer te hebben verstrekt.

Ik bevestig dat geen enkele druk op de deelnemers is uitgeoefend om hem/haar te doen toestemmen tot deelname aan de studie en ik ben bereid om op alle eventuele bijkomende vragen te antwoorden.

Ik bevestig dat ik werk in overeenstemming met de ethische beginselen zoals vermeld in de laatste versie van de "Verklaring van Helsinki", de "Goede klinische praktijk" en de Belgische wet van 7 mei 2004 inzake experimenten op de menselijke persoon.

Naam, Voornaam, Datum en handtekening van de onderzoeker:

### **III Aanvullende informatie**

#### **1 : Aanvullende informatie over de organisatie van de studie**

Om een goede vergelijking van de resultaten in beide onderzoeksgroepen mogelijk te maken vragen wij aan iedereen om bij het begin van de studie en na 1,5 en 3 maanden online vragenlijsten in te vullen. Dit geldt voor alle deelnemers, ongeacht de groep die geloot wordt. Het invullen van deze vragenlijsten neemt ongeveer 45 minuten per meetmoment van uw tijd in beslag. Deze vragenlijsten hebben betrekking op uw algemeen welbevinden. Deze studie eindigt na 3 maanden. Naast het invullen van de vragenlijsten zal aan de deelnemers ook gevraagd worden om gedurende 4 dagen een soort van dagboek bij te houden via de smartphone. Tijdens deze 4 dagen worden deelnemers gedurende de dag 10 maal opgepiept, daarbij wordt gevraagd een aantal korte vragen te beantwoorden over stemming en gedachten. Het beantwoorden van deze vragen duurt ongeveer 90 seconden.

#### **2. Aanvullende informatie over de risico's die verbonden zijn aan deelname aan de studie**

Niet van toepassing.

#### **3 : Aanvullende informatie over de bescherming en de rechten van deelnemers aan een klinische studie**

##### ***Ethische comités***

Deze studie werd geëvalueerd door een onafhankelijk ethisch comité (Ethische Commissie Onderzoek UZ/KU Leuven) dat een gunstig advies heeft uitgebracht. De ethische comités hebben als taak de personen die aan studies deelnemen te beschermen. Ze controleren of uw rechten als deelnemer aan een studie gerespecteerd worden, of de studie wetenschappelijk relevant en ethisch verantwoord is.

Hierover brengen de ethische comités een advies uit in overeenstemming met de Belgische wet van 7 mei 2004.

U dient het positief advies van de Ethische Comités in geen geval te beschouwen als een aansporing om deel te nemen aan deze studie.

##### ***Vrijwillige deelname***

Aarzel niet om alle vragen te stellen die bij u opkomen voordat u tekent.

U heeft het recht om niet deel te nemen aan deze studie of met deze studie te stoppen, zonder dat u hiervoor een reden hoeft te geven, zelfs al hebt u eerder toegestemd om aan deze studie deel te nemen.

Als u aanvaardt om aan deze studie deel te nemen, ondertekent u het toestemmingsformulier. De onderzoeker zal dit formulier ook ondertekenen en zal zo bevestigen dat hij u de noodzakelijke informatie over deze studie heeft gegeven.

U zal het voor u bestemde exemplaar ontvangen.

Het is wel aanbevolen om de onderzoeker op de hoogte te stellen, indien u besluit uw deelname aan de studie stop te zetten.

##### ***Kosten in verband met uw deelname***

Indien u besluit aan deze studie deel te nemen, worden alle onderzoeken en procedures in het kader van de studie door de opdrachtgever betaald.

##### ***Vertrouwelijkheidsgarantie***

Als opdrachtgever van het onderzoek, is KU Leuven de verwerkingsverantwoordelijke van uw persoonlijke gegevens die verwerkt worden in het kader van het onderzoek. Uw deelname aan de studie betekent dat u ermee akkoord gaat dat de onderzoeker gegevens over u verzamelt en dat de opdrachtgever van de studie die gebruikt voor onderzoek en in het kader van wetenschappelijke en medische publicaties. Uw gegevens zullen worden verwerkt overeenkomstig met de Europese Algemene verordening inzake gegevensbescherming (AVG/GDPR).

U hebt het recht om aan de onderzoeker te vragen welke gegevens zij over u heeft verzameld en waarvoor ze gebruikt worden in het kader van de studie. Deze gegevens hebben betrekking op uw huidige situatie, maar ook op

Informatie- en toestemmingsdocument3, gedateerd op 19/02/2019- pagina 6 van 8

uw voorgeschiedenis. U hebt het recht om deze gegevens in te kijken en om verbeteringen te laten aanbrengen indien ze foutief zouden zijn<sup>1</sup>.

De onderzoeker is verplicht om deze verzamelde gegevens vertrouwelijk te behandelen.

Dit betekent dat zij zich ertoe verbindt om uw naam nooit bekend te maken, bv. in het kader van een publicatie of een conferentie en dat zij uw gegevens zal coderen (uw identiteit zal worden vervangen door een identificatiecode in de studie) voordat zij ze doorgeeft aan de beheerder van de databank (KU Leuven).

De onderzoeker en haar team zullen gedurende de volledige studie de enige personen zijn, die een verband kunnen leggen tussen de overgedragen gegevens en uw dossier<sup>2</sup>.

De overgedragen persoonlijke gegevens omvatten geen combinatie van elementen waarmee het mogelijk is u te identificeren<sup>3</sup>.

De door de opdrachtgever aangestelde beheerder van de onderzoeksgegevens kan u niet identificeren op basis van de overgedragen gegevens. Deze persoon is verantwoordelijk voor het verzamelen van de gegevens, die door alle onderzoekers die deelnemen aan de studie zijn verzameld en voor de verwerking en de bescherming van die gegevens in overeenstemming met de Belgische wet betreffende de bescherming van de persoonlijke levenssfeer.

Om de kwaliteit van de studie te controleren, kunnen uw gegevens worden ingekeken door personen die gebonden zijn aan het beroepsgeheim, zoals vertegenwoordigers van de ethische comités, van de opdrachtgever van de studie, of een door hen aangesteld extern auditbureau. Dit kan enkel gebeuren onder strikte voorwaarden, onder de verantwoordelijkheid van de onderzoeker en onder zijn/haar toezicht (of van één van zijn/haar onderzoeksmedewerkers).

De (gecodeerde) onderzoeksgegevens kunnen doorgegeven worden aan Belgische of andere regelgevende instanties, aan de betrokken ethische comités, aan andere onderzoekers en/of instellingen die samenwerken met de opdrachtgever.

Ze kunnen ook doorgegeven worden aan andere sites van de opdrachtgever in België. Dit gebeurt dan steeds in gecodeerde vorm zoals hierboven uitgelegd.

Uw toestemming om aan deze studie deel te nemen betekent dus ook dat u akkoord gaat dat uw gecodeerde gegevens gebruikt worden voor doeleinden die in dit informatieformulier beschreven staan en dat ze overgedragen worden aan bovenvermelde personen en/of instellingen.

De opdrachtgever zal de verzamelde gegevens gebruiken in het kader van de studie waaraan u deelneemt, maar wil ze ook kunnen aanwenden in het kader van andere studies over dezelfde problemen als de uwe. Buiten de context die beschreven wordt in dit document, kunnen uw gegevens enkel gebruikt worden als een ethisch comité haar goedkeuring heeft gegeven.

Indien u uw toestemming tot deelname aan de studie intrekt, zullen de gecodeerde gegevens die al verzameld waren vóór uw terugtrekking, bewaard worden. Hierdoor wordt de geldigheid van de studie gegarandeerd. Er zal geen enkel nieuw gegeven aan de opdrachtgever worden doorgegeven.

Indien u vragen hebt over hoe wij uw gegevens gebruiken, dan kan u hiervoor steeds terecht bij uw onderzoeker.

Ook de functionarissen voor gegevensbescherming van het onderzoekcentrum staan ter uwer beschikking.

De contactgegevens van deze laatste zijn als volgt:

DPO - UZ Leuven, Herestraat 49, 3000 Leuven, "het privacy-team" van KU Leuven.

Tot slot heeft u ook het recht om een klacht in te dienen over hoe uw gegevens worden behandeld, bij de Belgische toezichthoudende instantie die verantwoordelijk is voor het handhaven van de wetgeving inzake gegevensbescherming:

Gegevensbeschermingsautoriteit (GBA), Drukpersstraat 35, 1000 Brussel, Tel. +32 2 274 48 00

<sup>1</sup> Deze rechten zijn bepaald door de Algemene Verordening Gegevensbescherming, EU verordening 2016/679 en door de wet van 22 augustus 2002 betreffende de rechten van de patiënt.

<sup>2</sup> Voor klinische studies verplicht de wet om het verband met uw dossier gedurende 20 jaar te behouden. In geval van een studiegeneesmiddel voor een innoverende therapie waarbij gebruik wordt gemaakt van menselijk lichaamsmateriaal, bedraagt deze periode minimaal 30 jaar en maximaal 50 jaar in overeenstemming met de Belgische wet van 19 december 2008 inzake het gebruik van menselijk lichaamsmateriaal en de geldende Koninklijke Besluiten..

<sup>3</sup> De gegevensbank met onderzoeksresultaten bevat dus geen verband met elementen zoals uw initialen, uw geslacht en uw volledige geboortedatum (dd/mm/jjjj).

E-mail: [contact@apd-gba.be](mailto:contact@apd-gba.be), Website: [www.gegevensbeschermingsautoriteit.be](http://www.gegevensbeschermingsautoriteit.be)

### **Verzekering**

Conform de Belgische wet van 7 mei 2004 betreffende experimenten op de menselijke persoon is de opdrachtgever, KU Leuven - ook indien er geen sprake is van fout - aansprakelijk voor de schade die u als deelnemer en/of uw rechthebbenden, oplopen en die rechtstreeks of onrechtstreeks verband houdt met deelname aan de studie. U moet hiervoor dus geen fout aantonen. KU Leuven heeft voor deze aansprakelijkheid een verzekering afgesloten<sup>4</sup>. Indien u dit wenselijk acht kan u zelf de verzekeraar dagvaarden.

De contactgegevens van de verzekeraar zijn de volgende:

Amlin Insurance SE, Vanbreda Risk & Benefits NV, Plantin en Moretuslei, 297, 2140 Antwerpen.

---

<sup>4</sup> In overeenstemming met artikel 29 van de Belgische Wet inzake experimenten op de menselijke persoon (7 mei 2004) Informatie- en toestemmingsdocument3, gedateerd op 19/02/2019- pagina 8 van 8
